# Supplementary material
Source: PubMed Central journal article supplement (PMC3101711)
Supplement: NIHMS290675-supplement-01.pdf [file NIHMS290675-supplement-01.pdf]

**SUPPLEMENTAL APPENDIX FOR ONLINE ONLY**

**Appendix. Rates of Depression Diagnosis and Antidepressant Use by Race/Ethnicity among Long-Stay Nursing Home Residents, 1999-2007**

|                                                                     | 1999           | 2000           | 2001           | 2002           | 2003           | 2004           | 2005           | 2006           | 2007           |
|---------------------------------------------------------------------|----------------|----------------|----------------|----------------|----------------|----------------|----------------|----------------|----------------|
| <b>Total Sample</b>                                                 | <b>284,217</b> | <b>282,106</b> | <b>288,656</b> | <b>289,234</b> | <b>286,797</b> | <b>287,164</b> | <b>277,572</b> | <b>272,194</b> | <b>296,747</b> |
| <b>Diagnosed with Depression</b>                                    |                |                |                |                |                |                |                |                |                |
| Total                                                               | 33.8           | 36.7           | 39.7           | 42.1           | 44.8           | 46.9           | 48.7           | 50.6           | 51.8           |
| Non-Hispanic white                                                  | 36.0           | 39.0           | 42.2           | 44.8           | 47.6           | 49.8           | 51.8           | 53.6           | 55.1           |
| Non-Hispanic black                                                  | 20.5           | 22.9           | 25.9           | 27.7           | 30.0           | 32.5           | 34.3           | 36.6           | 39.4           |
| Hispanic                                                            | 30.6           | 33.9           | 36.6           | 39.3           | 42.4           | 44.5           | 46.1           | 48.0           | 48.3           |
| Other                                                               | 22.4           | 22.1           | 24.9           | 27.1           | 29.9           | 31.9           | 33.6           | 35.7           | 35.0           |
| <b>Antidepressant Use Among Residents Diagnosed with Depression</b> |                |                |                |                |                |                |                |                |                |
| Total                                                               | 71.3           | 74.3           | 76.2           | 77.7           | 79.4           | 80.9           | 81.9           | 83.1           | 82.8           |

|                    |      |      |      |      |      |      |      |      |      |
|--------------------|------|------|------|------|------|------|------|------|------|
| Non-Hispanic white | 71.7 | 74.9 | 76.9 | 78.4 | 80.1 | 81.7 | 82.6 | 83.9 | 83.6 |
| Non-Hispanic black | 65.7 | 68.2 | 69.4 | 71.6 | 73.4 | 74.8 | 76.0 | 77.3 | 77.8 |
| Hispanic           | 69.4 | 72.3 | 73.9 | 76.1 | 78.5 | 79.5 | 81.1 | 82.6 | 82.5 |
| Other              | 70.7 | 71.2 | 73.6 | 73.6 | 75.2 | 77.7 | 79.6 | 80.0 | 79.1 |

**Proportion of All Residents**

**Diagnosed with Depression**

**and Using Antidepressants**

|                    |      |      |      |      |      |      |      |      |      |
|--------------------|------|------|------|------|------|------|------|------|------|
| Total              | 24.1 | 27.3 | 30.3 | 32.7 | 35.6 | 37.9 | 39.9 | 42.0 | 42.9 |
| Non-Hispanic white | 25.8 | 29.2 | 32.5 | 35.1 | 38.2 | 40.7 | 42.7 | 45.0 | 46.0 |
| Non-Hispanic black | 13.5 | 15.6 | 18.0 | 19.9 | 22.0 | 24.3 | 26.1 | 28.3 | 30.7 |
| Hispanic           | 21.2 | 24.5 | 27.0 | 30.0 | 33.3 | 35.4 | 37.4 | 39.7 | 39.9 |
| Other              | 15.9 | 15.8 | 18.3 | 19.9 | 22.5 | 24.8 | 26.7 | 28.6 | 27.7 |

---

*Note:* Based on residents aged 65 and older in nursing homes in 8 states, excluding those who were in the home for less than 3 months, comatose, had an active diagnosis of schizophrenia or bipolar disorder, or were living in a hospital-based nursing home.
